# Supplementary material
Source: MDPI journal article supplement (https://www.mdpi.com/2071-1050/14/6/3164)
Supplement: s1 [file s1]

DESCRIPTIVES VARIABLES=EoMInDisCulDisLnGeoDisLnEcoDisLnVen FTA  
/STATISTICS=MEAN STDDEV MIN MAX.

## Descriptives

**Table S1: Descriptive Statistics Information**

| Notes                  |                                |                                                                                                             |
|------------------------|--------------------------------|-------------------------------------------------------------------------------------------------------------|
| Output Created         |                                | 15-JAN-2022 14:30:56                                                                                        |
| Comments               |                                |                                                                                                             |
| Input                  | Active Dataset                 | DataSet1                                                                                                    |
|                        | Filter                         | <none>                                                                                                      |
|                        | Weight                         | <none>                                                                                                      |
|                        | Split File                     | <none>                                                                                                      |
|                        | N of Rows in Working Data File | 446                                                                                                         |
| Missing Value Handling | Definition of Missing          | User defined missing values are treated as missing.                                                         |
|                        | Cases Used                     | All non-missing data are used.                                                                              |
| Syntax                 |                                | DESCRIPTIVES<br>VARIABLES=EoMInDisCulDisLnGeoDisLnEcoDisLnVen<br>FTA<br>/STATISTICS=MEAN<br>STDDEV MIN MAX. |
| Resources              | Processor Time                 | 00:00:00.02                                                                                                 |
|                        | Elapsed Time                   | 00:00:00.01                                                                                                 |

[DataSet1]

**Table S2: Descriptive Statistics Result**

| Descriptive Statistics |     |         |         |      |                |
|------------------------|-----|---------|---------|------|----------------|
|                        | N   | Minimum | Maximum | Mean | Std. Deviation |
| EoM                    | 439 | 0       | 1       | .78  | .415           |
| InDis                  | 439 | 0       | 10      | 4.77 | 2.684          |
| CulDis                 | 439 | 0       | 4       | 1.58 | 1.113          |
| LnGeoDis               | 439 | 7       | 9       | 7.87 | .809           |
| LnEcoDis               | 439 | 6       | 11      | 9.35 | .993           |
| LnVen                  | 439 | 2       | 12      | 7.77 | 1.478          |
| FTA                    | 439 | 0       | 1       | .41  | .492           |
| Valid N (listwise)     | 439 |         |         |      |                |

ONEWAY InDisCulDisLnGeoDisLnEcoDis BY Reg  
 /STATISTICS DESCRIPTIVES HOMOGENEITY  
 /PLOT MEANS  
 /MISSING ANALYSIS.

## Oneway

**Table S3: One-way ANOVA by Region Information**

| Notes                  |                                |                                                                                                                                 |
|------------------------|--------------------------------|---------------------------------------------------------------------------------------------------------------------------------|
| Output Created         |                                | 15-JAN-2022 14:33:26                                                                                                            |
| Comments               |                                |                                                                                                                                 |
| Input                  | Active Dataset                 | DataSet1                                                                                                                        |
|                        | Filter                         | <none>                                                                                                                          |
|                        | Weight                         | <none>                                                                                                                          |
|                        | Split File                     | <none>                                                                                                                          |
|                        | N of Rows in Working Data File | 446                                                                                                                             |
| Missing Value Handling | Definition of Missing          | User-defined missing values are treated as missing.                                                                             |
|                        | Cases Used                     | Statistics for each analysis are based on cases with no missing data for any variable in the analysis.                          |
| Syntax                 |                                | ONEWAY<br>InDisCulDisLnGeoDisLnEcoDis BY Reg<br>/STATISTICS<br>DESCRIPTIVES<br>HOMOGENEITY<br>/PLOT MEANS<br>/MISSING ANALYSIS. |
| Resources              | Processor Time                 | 00:00:00.89                                                                                                                     |
|                        | Elapsed Time                   | 00:00:01.18                                                                                                                     |

[DataSet1]

**Table S4: One-way ANOVA by Region Result**

| Descriptives |   |      |                |                                  |
|--------------|---|------|----------------|----------------------------------|
|              | N | Mean | Std. Deviation | Std. Error                       |
|              |   |      |                | 95% Confidence Interval for Mean |

|          |       |     |       |       | Lower Bound | Upper Bound |       |
|----------|-------|-----|-------|-------|-------------|-------------|-------|
| InDis    | 1     | 234 | 4.09  | 1.812 | .118        | 3.86        | 4.32  |
|          | 2     | 75  | 6.73  | 2.564 | .296        | 6.14        | 7.32  |
|          | 3     | 19  | 6.89  | .937  | .215        | 6.44        | 7.35  |
|          | 4     | 25  | 7.64  | 1.997 | .399        | 6.82        | 8.46  |
|          | 5     | 86  | 3.58  | 3.397 | .366        | 2.85        | 4.31  |
|          | Total | 439 | 4.77  | 2.684 | .128        | 4.51        | 5.02  |
| CulDis   | 1     | 234 | 1.38  | 1.067 | .070        | 1.25        | 1.52  |
|          | 2     | 75  | 2.53  | .502  | .058        | 2.42        | 2.65  |
|          | 3     | 19  | 2.79  | .419  | .096        | 2.59        | 2.99  |
|          | 4     | 25  | 2.96  | .455  | .091        | 2.77        | 3.15  |
|          | 5     | 86  | .63   | .486  | .052        | .52         | .73   |
|          | Total | 439 | 1.58  | 1.113 | .053        | 1.48        | 1.69  |
| LnGeoDis | 1     | 234 | 7.39  | .489  | .032        | 7.33        | 7.46  |
|          | 2     | 75  | 9.00  | .000  | .000        | 9.00        | 9.00  |
|          | 3     | 19  | 9.00  | .000  | .000        | 9.00        | 9.00  |
|          | 4     | 25  | 8.96  | .200  | .040        | 8.88        | 9.04  |
|          | 5     | 86  | 7.60  | .492  | .053        | 7.50        | 7.71  |
|          | Total | 439 | 7.87  | .809  | .039        | 7.79        | 7.94  |
| LnEcoDis | 1     | 234 | 9.32  | .877  | .057        | 9.21        | 9.44  |
|          | 2     | 75  | 9.71  | .955  | .110        | 9.49        | 9.93  |
|          | 3     | 19  | 10.00 | 1.000 | .229        | 9.52        | 10.48 |
|          | 4     | 25  | 9.08  | .400  | .080        | 8.91        | 9.25  |
|          | 5     | 86  | 9.05  | 1.264 | .136        | 8.78        | 9.32  |
|          | Total | 439 | 9.35  | .993  | .047        | 9.26        | 9.44  |

Table S5: One-way ANOVA by Region Result (cont)

| Descriptives |       |         |         |
|--------------|-------|---------|---------|
|              |       | Minimum | Maximum |
| InDis        | 1     | 0       | 8       |
|              | 2     | 0       | 10      |
|              | 3     | 5       | 8       |
|              | 4     | 1       | 9       |
|              | 5     | 0       | 9       |
|              | Total | 0       | 10      |
| CulDis       | 1     | 0       | 4       |
|              | 2     | 2       | 3       |

|          |       |   |    |
|----------|-------|---|----|
| LnGeoDis | 3     | 2 | 3  |
|          | 4     | 1 | 4  |
|          | 5     | 0 | 1  |
|          | Total | 0 | 4  |
|          | 1     | 7 | 8  |
|          | 2     | 9 | 9  |
|          | 3     | 9 | 9  |
|          | 4     | 8 | 9  |
|          | 5     | 7 | 8  |
|          | Total | 7 | 9  |
| LnEcoDis | 1     | 6 | 11 |
|          | 2     | 7 | 11 |
|          | 3     | 9 | 11 |
|          | 4     | 9 | 11 |
|          | 5     | 6 | 11 |
|          | Total | 6 | 11 |

**Table S6: Levene Statistic by Region Result**

| Test of Homogeneity of Variances |                  |     |     |      |
|----------------------------------|------------------|-----|-----|------|
|                                  | Levene Statistic | df1 | df2 | Sig. |
| InDis                            | 33.706           | 4   | 434 | .000 |
| CulDis                           | 15.324           | 4   | 434 | .000 |
| LnGeoDis                         | 472.833          | 4   | 434 | .000 |
| LnEcoDis                         | 14.449           | 4   | 434 | .000 |

**Table S7: Multiple Comparisons by Region**

| ANOVA    |                |                |     |             |         |      |
|----------|----------------|----------------|-----|-------------|---------|------|
|          |                | Sum of Squares | df  | Mean Square | F       | Sig. |
| InDis    | Between Groups | 810.572        | 4   | 202.643     | 37.516  | .000 |
|          | Within Groups  | 2344.262       | 434 | 5.402       |         |      |
|          | Total          | 3154.834       | 438 |             |         |      |
| CulDis   | Between Groups | 230.453        | 4   | 57.613      | 80.074  | .000 |
|          | Within Groups  | 312.262        | 434 | .719        |         |      |
|          | Total          | 542.715        | 438 |             |         |      |
| LnGeoDis | Between Groups | 208.990        | 4   | 52.247      | 293.164 | .000 |
|          | Within Groups  | 77.347         | 434 | .178        |         |      |
|          | Total          | 286.337        | 438 |             |         |      |
| LnEcoDis | Between Groups | 27.460         | 4   | 6.865       | 7.365   | .000 |

|               |         |     |      |  |  |
|---------------|---------|-----|------|--|--|
| Within Groups | 404.517 | 434 | .932 |  |  |
| Total         | 431.977 | 438 |      |  |  |

Means Plots

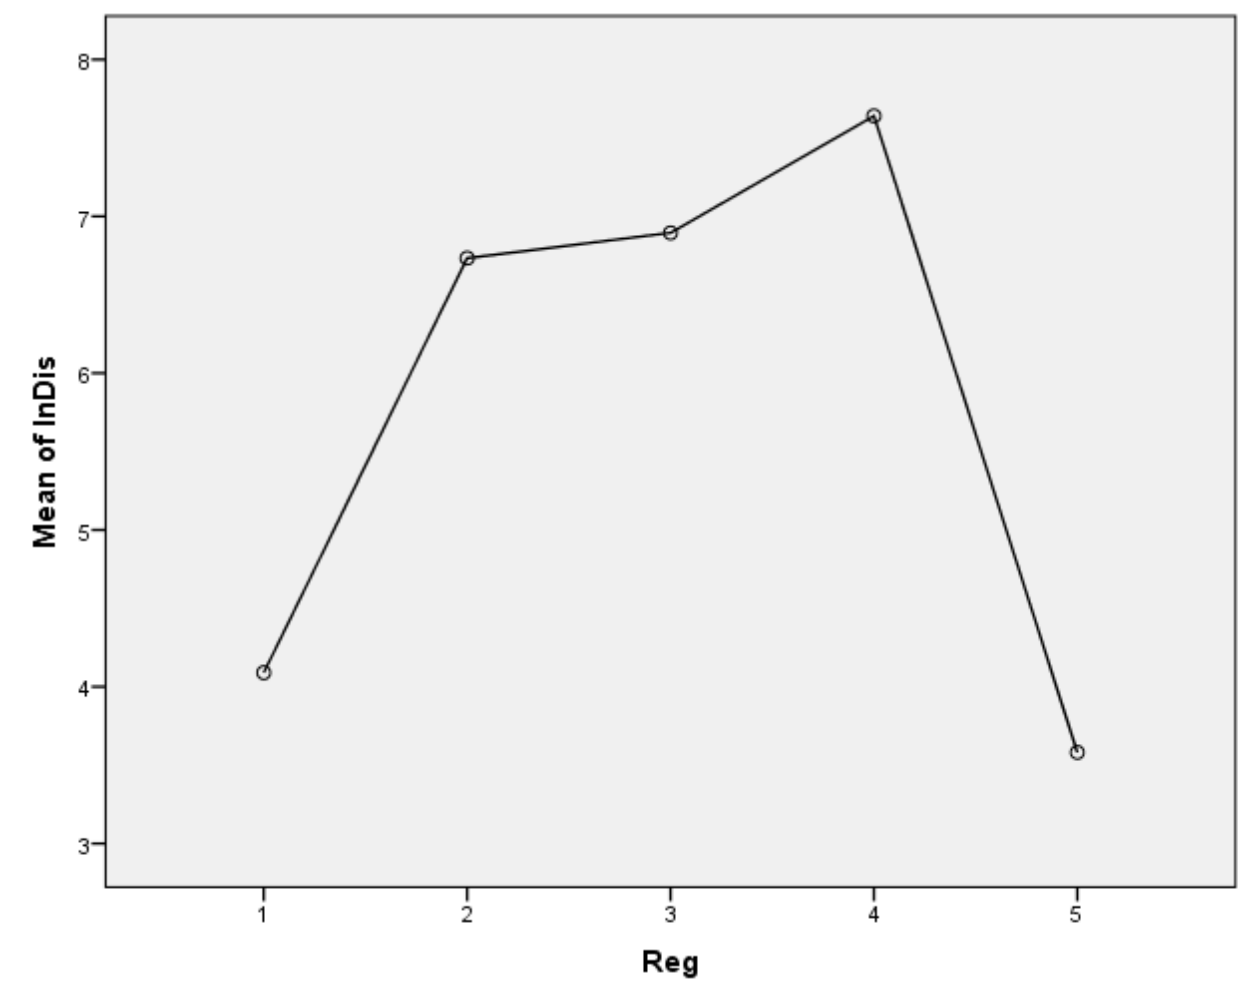

Figure S1: Mean of InDis by Region

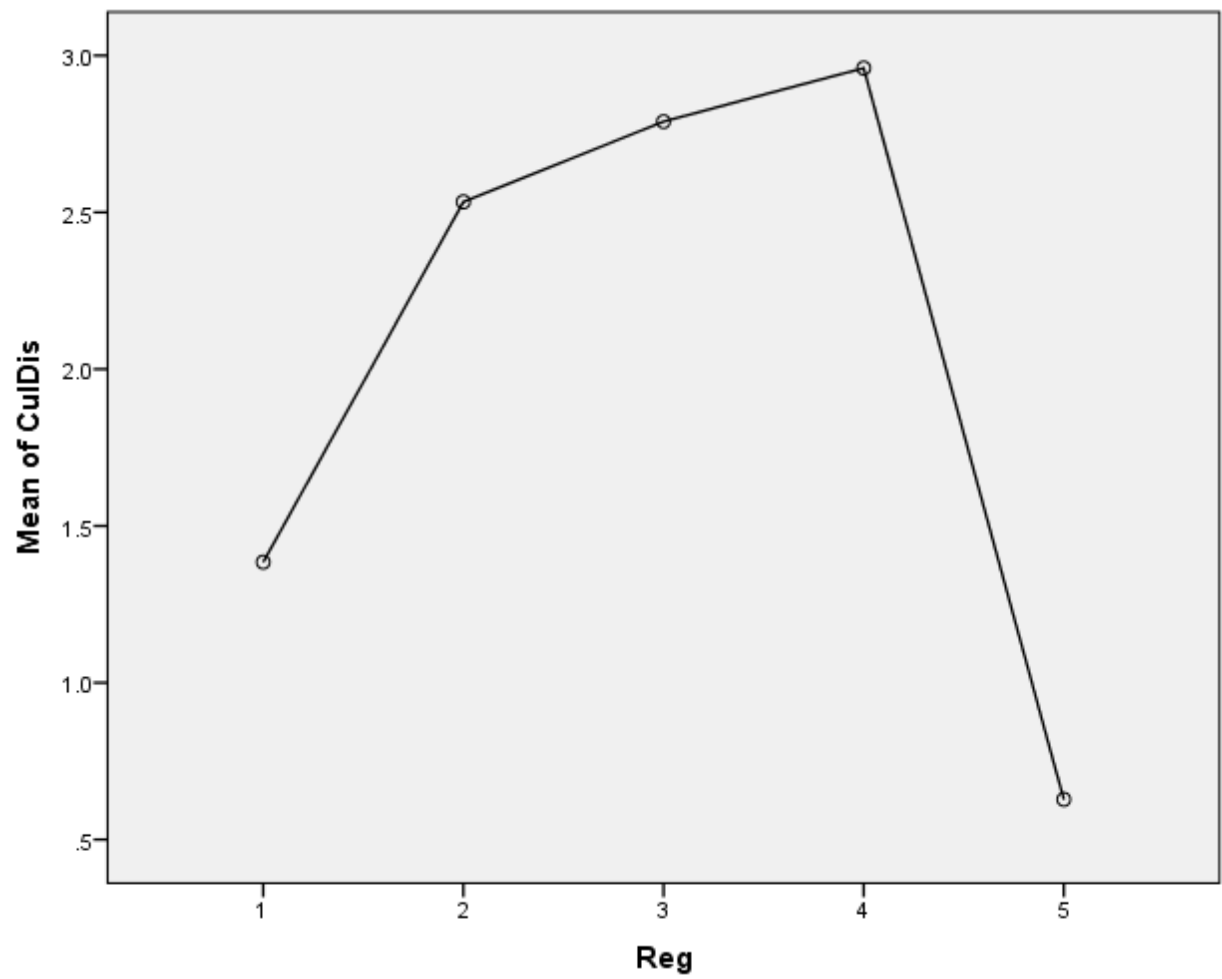

Figure S2: Mean of CulDis by Region

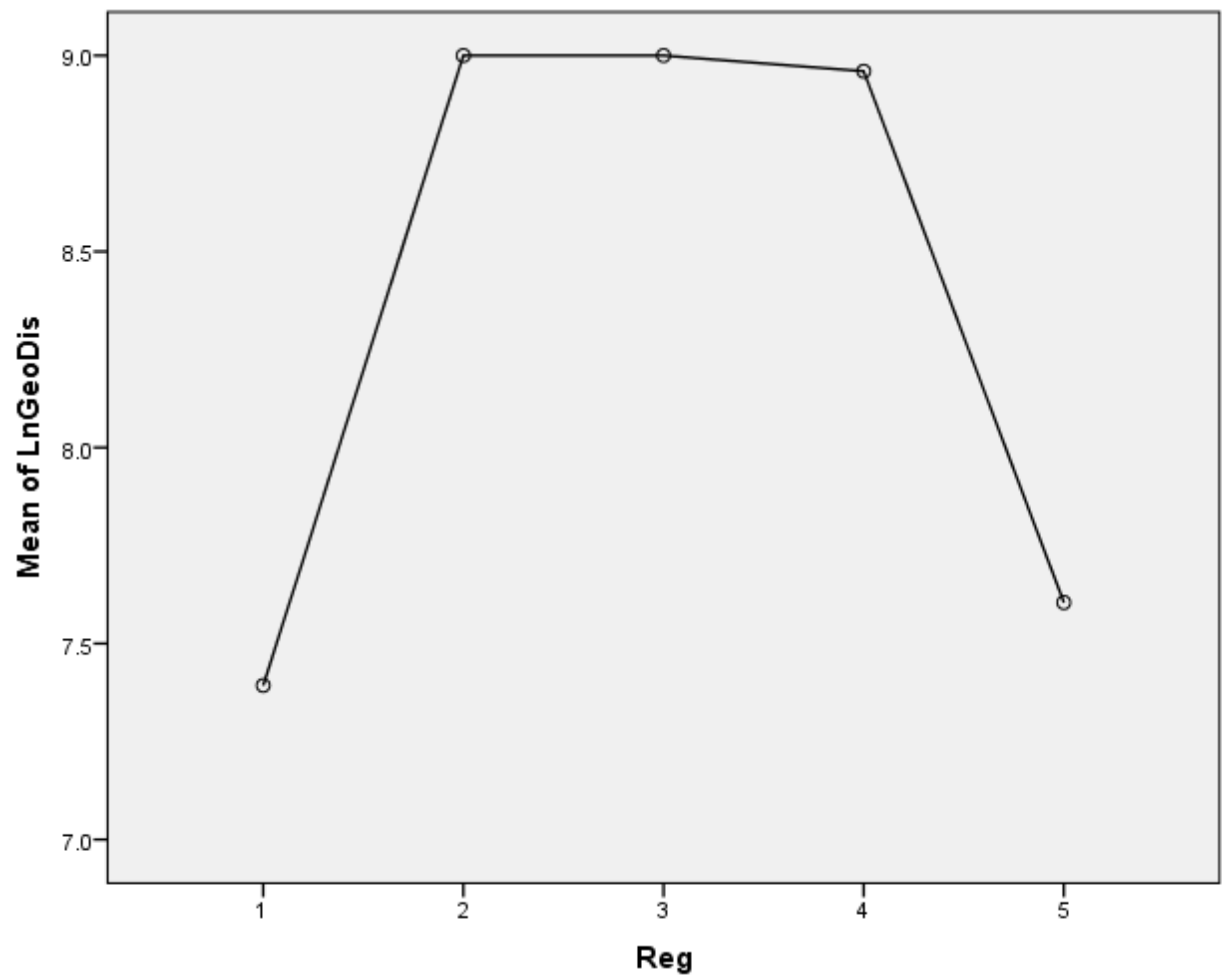

Figure S3: Mean of LnGeo by Region

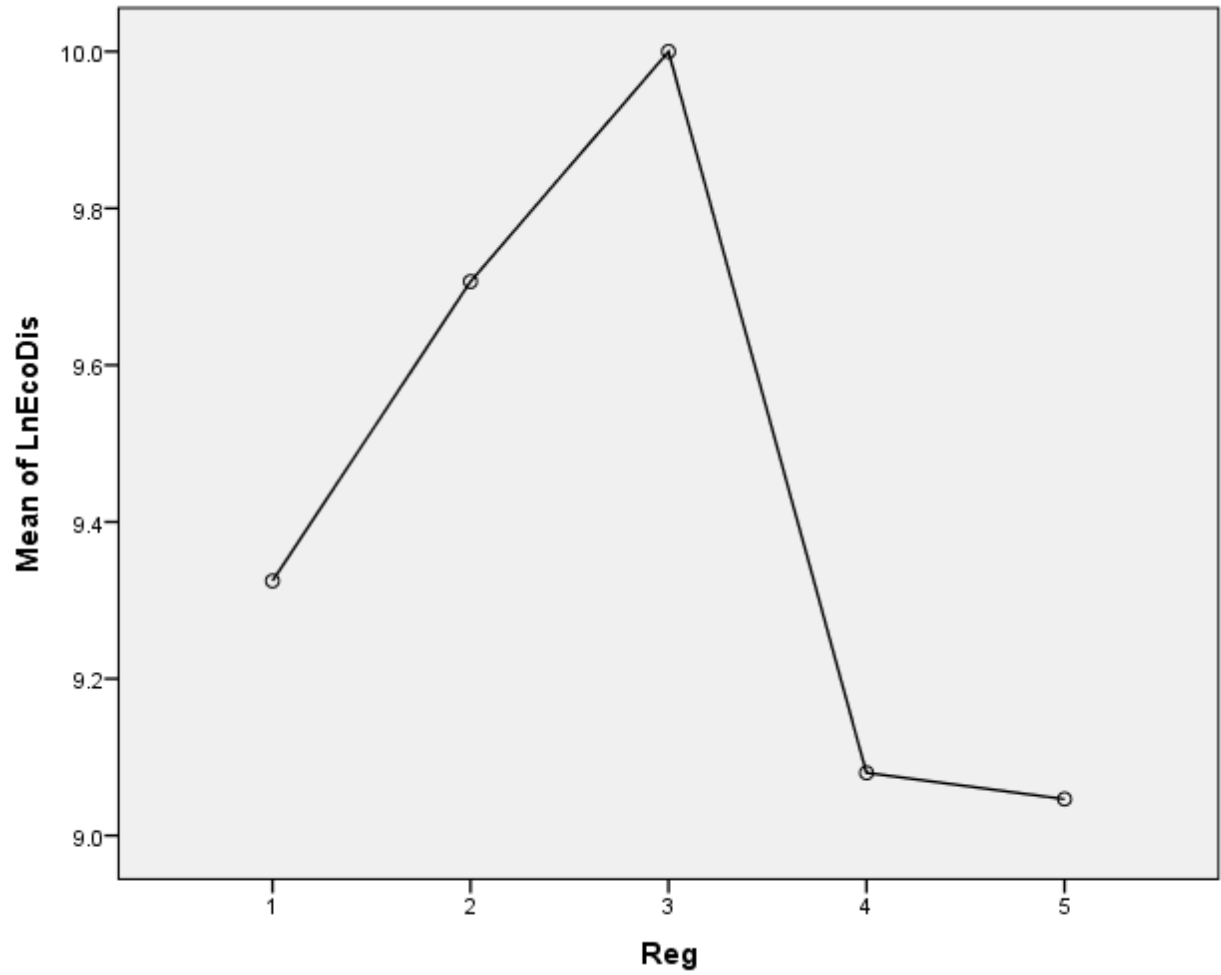

**Figure S4: Mean of LnEcoDis by Region**

ONEWAY InDisCulDisLnGeoDisLnEcoDis BY InPe\_A  
 /STATISTICS DESCRIPTIVES HOMOGENEITY  
 /PLOT MEANS  
 /MISSING ANALYSIS.

**Oneway**

**Table S8: One-way ANOVA by Investment Period Information**

| Notes          |                |                      |
|----------------|----------------|----------------------|
| Output Created |                | 15-JAN-2022 14:36:10 |
| Comments       |                |                      |
|                | Active Dataset | DataSet1             |
|                | Filter         | <none>               |
| Input          | Weight         | <none>               |
|                | Split File     | <none>               |



|                        |                                |                                                                                                                                        |
|------------------------|--------------------------------|----------------------------------------------------------------------------------------------------------------------------------------|
| Missing Value Handling | N of Rows in Working Data File | 446                                                                                                                                    |
|                        | Definition of Missing          | User-defined missing values are treated as missing.                                                                                    |
|                        | Cases Used                     | Statistics for each analysis are based on cases with no missing data for any variable in the analysis.                                 |
|                        | Syntax                         | ONEWAY<br>InDisCulDisLnGeoDisLnEco<br>Dis BY InPe_A<br>/STATISTICS<br>DESCRIPTIVES<br>HOMOGENEITY<br>/PLOT MEANS<br>/MISSING ANALYSIS. |
| Resources              | Processor Time                 | 00:00:00.58                                                                                                                            |
|                        | Elapsed Time                   | 00:00:00.85                                                                                                                            |

[DataSet1]

**Table S9: One-way ANOVA by Investment Period Result**

| Descriptives |       |      |                |            |                                  |             |      |
|--------------|-------|------|----------------|------------|----------------------------------|-------------|------|
|              | N     | Mean | Std. Deviation | Std. Error | 95% Confidence Interval for Mean |             |      |
|              |       |      |                |            | Lower Bound                      | Upper Bound |      |
| InDis        | 1     | 70   | 4.74           | 2.471      | .295                             | 4.15        | 5.33 |
|              | 2     | 180  | 4.91           | 2.669      | .199                             | 4.51        | 5.30 |
|              | 3     | 189  | 4.64           | 2.779      | .202                             | 4.24        | 5.04 |
|              | Total | 439  | 4.77           | 2.684      | .128                             | 4.51        | 5.02 |
| CulDis       | 1     | 70   | 1.46           | 1.176      | .141                             | 1.18        | 1.74 |
|              | 2     | 180  | 1.59           | 1.113      | .083                             | 1.43        | 1.75 |
|              | 3     | 189  | 1.62           | 1.092      | .079                             | 1.47        | 1.78 |
|              | Total | 439  | 1.58           | 1.113      | .053                             | 1.48        | 1.69 |
| LnGeoDis     | 1     | 70   | 7.67           | .775       | .093                             | 7.49        | 7.86 |
|              | 2     | 180  | 7.84           | .833       | .062                             | 7.72        | 7.96 |
|              | 3     | 189  | 7.97           | .785       | .057                             | 7.86        | 8.08 |
|              | Total | 439  | 7.87           | .809       | .039                             | 7.79        | 7.94 |
| LnEcoDis     | 1     | 70   | 9.01           | .893       | .107                             | 8.80        | 9.23 |
|              | 2     | 180  | 9.32           | 1.000      | .075                             | 9.17        | 9.46 |

|       |     |      |      |      |      |      |
|-------|-----|------|------|------|------|------|
| 3     | 189 | 9.51 | .993 | .072 | 9.37 | 9.65 |
| Total | 439 | 9.35 | .993 | .047 | 9.26 | 9.44 |

**Table S10: One-way ANOVA by Investment Period Result (cont)**

| Descriptives |       |  | Minimum | Maximum |
|--------------|-------|--|---------|---------|
| InDis        | 1     |  | 1       | 9       |
|              | 2     |  | 0       | 10      |
|              | 3     |  | 0       | 10      |
|              | Total |  | 0       | 10      |
| CulDis       | 1     |  | 0       | 4       |
|              | 2     |  | 0       | 4       |
|              | 3     |  | 0       | 3       |
|              | Total |  | 0       | 4       |
| LnGeoDis     | 1     |  | 7       | 9       |
|              | 2     |  | 7       | 9       |
|              | 3     |  | 7       | 9       |
|              | Total |  | 7       | 9       |
| LnEcoDis     | 1     |  | 6       | 10      |
|              | 2     |  | 6       | 11      |
|              | 3     |  | 7       | 11      |
|              | Total |  | 6       | 11      |

**Table S11: Levene Statistic for Investment PeriodResult**

| Test of Homogeneity of Variances |                  |     |     |      |
|----------------------------------|------------------|-----|-----|------|
|                                  | Levene Statistic | df1 | df2 | Sig. |
| InDis                            | 2.614            | 2   | 436 | .074 |
| CulDis                           | .455             | 2   | 436 | .635 |
| LnGeoDis                         | 3.267            | 2   | 436 | .039 |
| LnEcoDis                         | 8.855            | 2   | 436 | .000 |

**Table S12: Multiple Comparisons by Investment Period**

| ANOVA |                |                |     |             |      |      |
|-------|----------------|----------------|-----|-------------|------|------|
|       |                | Sum of Squares | df  | Mean Square | F    | Sig. |
| InDis | Between Groups | 6.533          | 2   | 3.267       | .452 | .636 |
|       | Within Groups  | 3148.300       | 436 | 7.221       |      |      |

|          |                |          |     |       |       |      |
|----------|----------------|----------|-----|-------|-------|------|
| CulDis   | Total          | 3154.834 | 438 |       |       |      |
|          | Between Groups | 1.438    | 2   | .719  | .579  | .561 |
|          | Within Groups  | 541.277  | 436 | 1.241 |       |      |
| LnGeoDis | Total          | 542.715  | 438 |       |       |      |
|          | Between Groups | 4.757    | 2   | 2.378 | 3.683 | .026 |
|          | Within Groups  | 281.580  | 436 | .646  |       |      |
| LnEcoDis | Total          | 286.337  | 438 |       |       |      |
|          | Between Groups | 12.803   | 2   | 6.402 | 6.659 | .001 |
|          | Within Groups  | 419.174  | 436 | .961  |       |      |
|          | Total          | 431.977  | 438 |       |       |      |

Means Plots

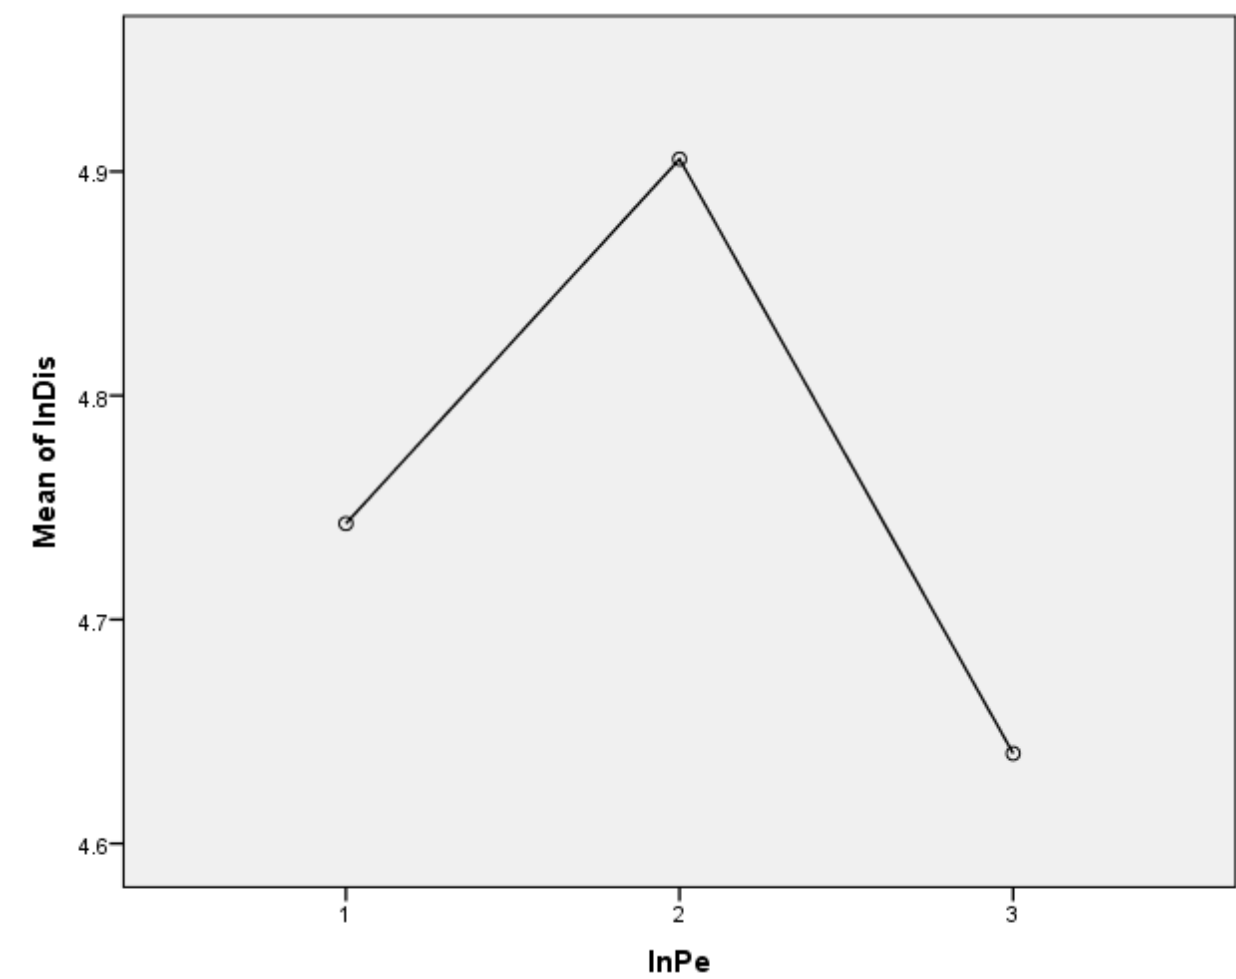

Figure S5: Mean of InDis by Investment Period

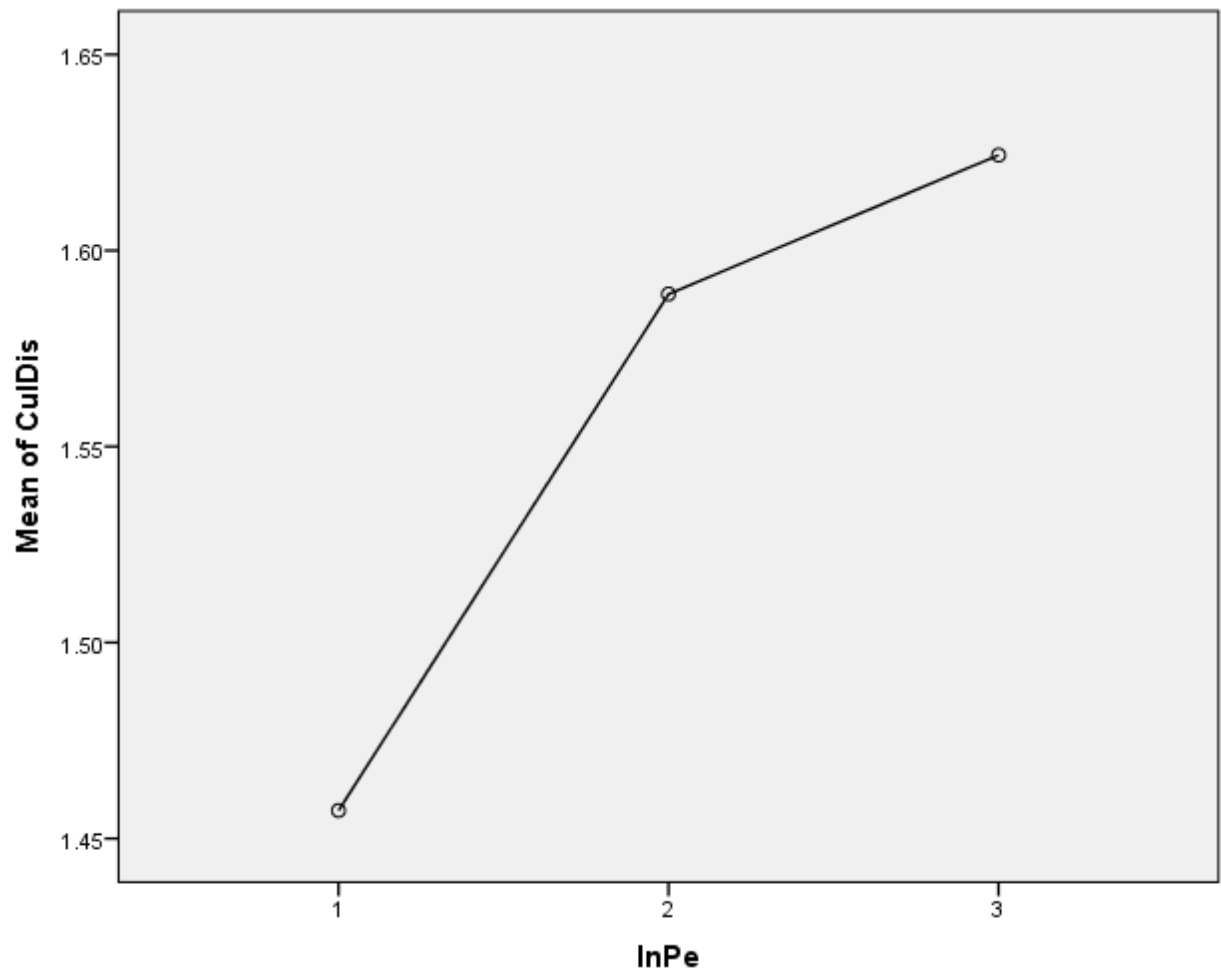

Figure S6: Mean of CulDis by Investment Period

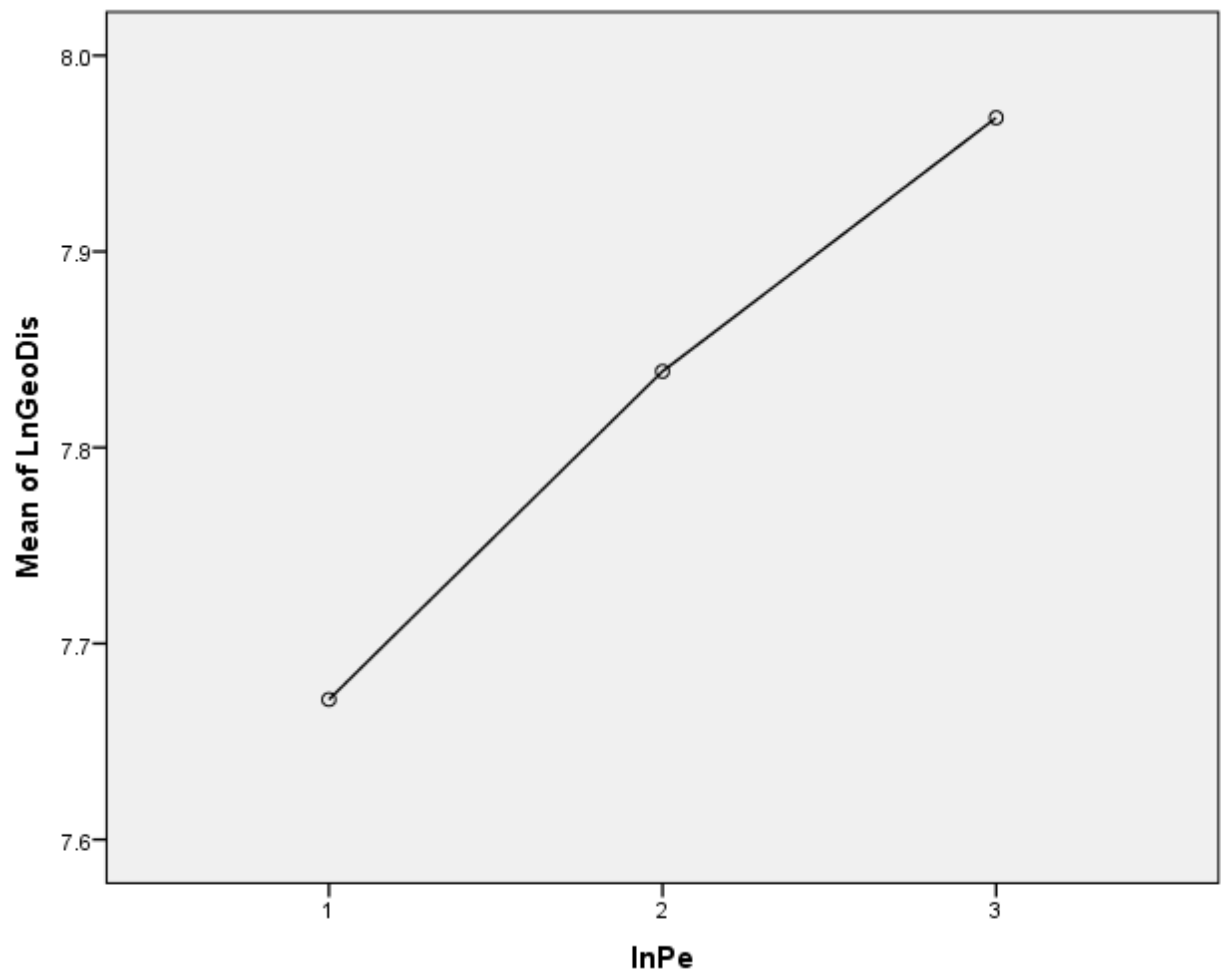

Figure S7: Mean of LnGeoDis by Investment Period

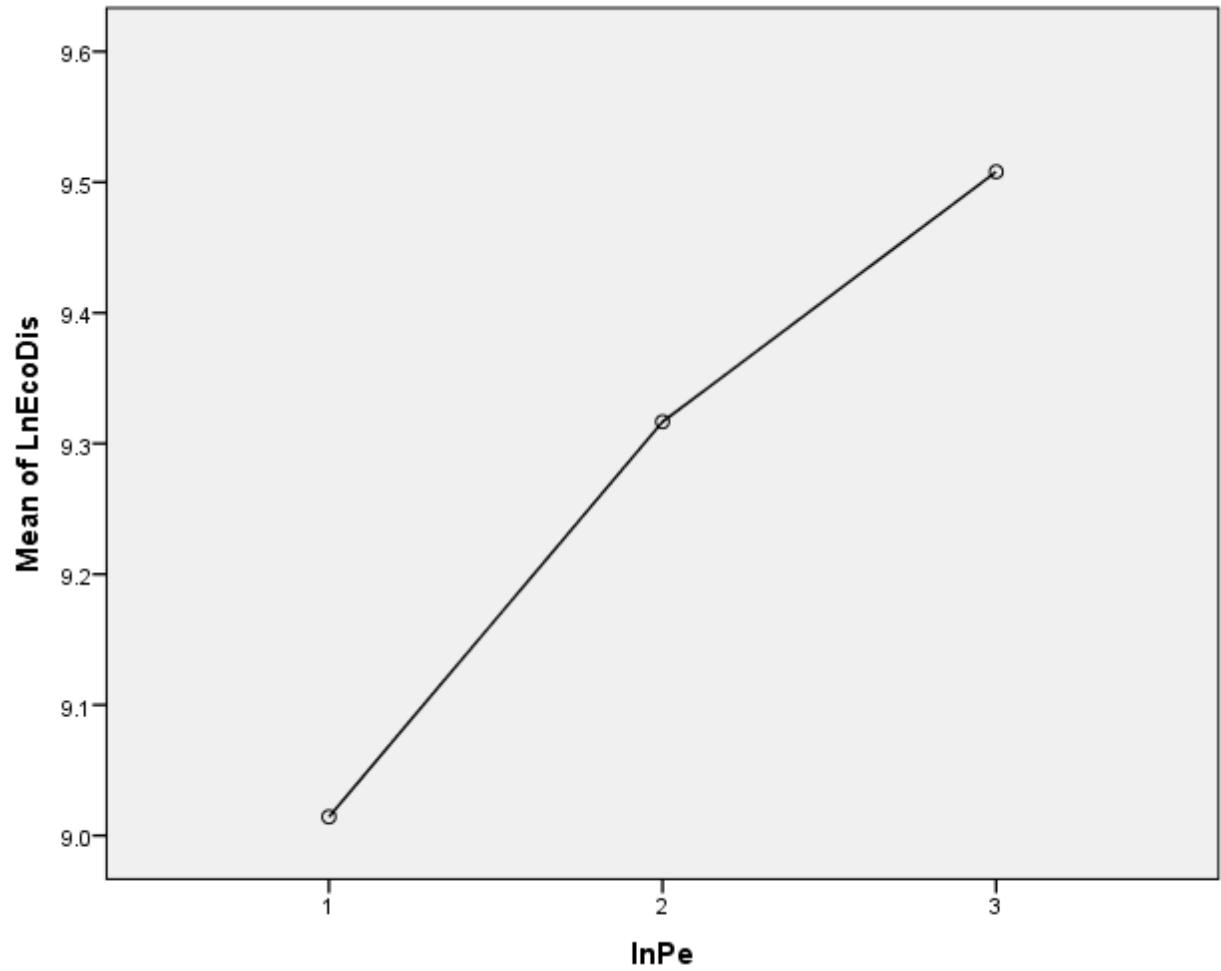

Figure S8: Mean of LnEcoDis by Investment Period

#### CORRELATIONS

```

/VARIABLES=EoMInDisCulDisLnGeoDisLnEcoDisLnVen FTA
/PRINT=TWOTAIL NOSIG
/MISSING=PAIRWISE.

```

#### Correlations

Table S13: Correlations Information

| Notes          |                      |          |
|----------------|----------------------|----------|
| Output Created | 15-JAN-2022 14:38:29 |          |
| Comments       |                      |          |
| Input          | Active Dataset       | DataSet1 |
|                | Filter               | <none>   |
|                | Weight               | <none>   |
|                | Split File           | <none>   |

|                        |                                |                                                                                                 |
|------------------------|--------------------------------|-------------------------------------------------------------------------------------------------|
| Missing Value Handling | N of Rows in Working Data File | 446                                                                                             |
|                        | Definition of Missing          | User-defined missing values are treated as missing.                                             |
|                        | Cases Used                     | Statistics for each pair of variables are based on all the cases with valid data for that pair. |
|                        |                                | CORRELATIONS                                                                                    |
| Syntax                 |                                | /VARIABLES=EoMInDisCulDisLnGeoDisLnEcoDisLnVen FTA                                              |
|                        |                                | /PRINT=TWOTAIL                                                                                  |
|                        |                                | NOSIG                                                                                           |
|                        |                                | /MISSING=PAIRWISE.                                                                              |
| Resources              | Processor Time                 | 00:00:00.20                                                                                     |
|                        | Elapsed Time                   | 00:00:00.31                                                                                     |

[DataSet1]

**Table S14: Correlations Result**

|          |                     | Correlations |        |         |          |          |       |
|----------|---------------------|--------------|--------|---------|----------|----------|-------|
|          |                     | EoM          | InDis  | CulDis  | LnGeoDis | LnEcoDis | LnVen |
| EoM      | Pearson Correlation | 1            | .041   | -.190** | -.155**  | .205**   | .093  |
|          | Sig. (2-tailed)     |              | .386   | .000    | .001     | .000     | .053  |
|          | N                   | 439          | 439    | 439     | 439      | 439      | 439   |
| InDis    | Pearson Correlation | .041         | 1      | .356**  | .551**   | .578**   | .094* |
|          | Sig. (2-tailed)     | .386         |        | .000    | .000     | .000     | .049  |
|          | N                   | 439          | 439    | 439     | 439      | 439      | 439   |
| CulDis   | Pearson Correlation | -.190**      | .356** | 1       | .644**   | .141**   | -.023 |
|          | Sig. (2-tailed)     | .000         | .000   |         | .000     | .003     | .629  |
|          | N                   | 439          | 439    | 439     | 439      | 439      | 439   |
| LnGeoDis | Pearson Correlation | -.155**      | .551** | .644**  | 1        | .376**   | -.018 |
|          | Sig. (2-tailed)     | .001         | .000   | .000    |          | .000     | .713  |
|          | N                   | 439          | 439    | 439     | 439      | 439      | 439   |
| LnEcoDis | Pearson Correlation | .205**       | .578** | .141**  | .376**   | 1        | .006  |
|          | Sig. (2-tailed)     | .000         | .000   | .003    | .000     |          | .895  |
|          | N                   | 439          | 439    | 439     | 439      | 439      | 439   |
| LnVen    | Pearson Correlation | .093         | .094*  | -.023   | -.018    | .006     | 1     |

|     |                     |      |         |         |       |       |       |
|-----|---------------------|------|---------|---------|-------|-------|-------|
|     | Sig. (2-tailed)     | .053 | .049    | .629    | .713  | .895  |       |
|     | N                   | 439  | 439     | 439     | 439   | 439   | 439   |
|     | Pearson Correlation | .082 | -.234** | -.137** | -.072 | -.058 | -.014 |
| FTA | Sig. (2-tailed)     | .086 | .000    | .004    | .134  | .224  | .770  |
|     | N                   | 439  | 439     | 439     | 439   | 439   | 439   |

**Table S15: Correlations Result (Cont)**

| Correlations |                     | FTA     |
|--------------|---------------------|---------|
| EoM          | Pearson Correlation | .082    |
|              | Sig. (2-tailed)     | .086    |
|              | N                   | 439     |
| InDis        | Pearson Correlation | -.234   |
|              | Sig. (2-tailed)     | .000    |
|              | N                   | 439     |
| CulDis       | Pearson Correlation | -.137** |
|              | Sig. (2-tailed)     | .004    |
|              | N                   | 439     |
| LnGeoDis     | Pearson Correlation | -.072** |
|              | Sig. (2-tailed)     | .134    |
|              | N                   | 439     |
| LnEcoDis     | Pearson Correlation | -.058** |
|              | Sig. (2-tailed)     | .224    |
|              | N                   | 439     |
| LnVen        | Pearson Correlation | -.014   |
|              | Sig. (2-tailed)     | .770    |
|              | N                   | 439     |
| FTA          | Pearson Correlation | 1       |
|              | Sig. (2-tailed)     |         |
|              | N                   | 439     |

\*\* . Correlation is significant at the 0.01 level (2-tailed).

\* . Correlation is significant at the 0.05 level (2-tailed).

#### REGRESSION

```

/MISSING LISTWISE
/STATISTICS COEFF OUTS R ANOVA COLLIN TOL
/CRITERIA=PIN(.05) POUT(.10)
/NOORIGIN
/DEPENDENT EoM
/METHOD=ENTER InDisCulDisLnGeoDisLnEcoDisLnVen FTA.

```



## Regression

**Table S16: Model 2 Information**

| Notes                  |                                               |                                                                                                                                                                                                                    |
|------------------------|-----------------------------------------------|--------------------------------------------------------------------------------------------------------------------------------------------------------------------------------------------------------------------|
| Output Created         |                                               | 15-JAN-2022 14:40:43                                                                                                                                                                                               |
| Comments               |                                               |                                                                                                                                                                                                                    |
| Input                  | Active Dataset                                | DataSet1                                                                                                                                                                                                           |
|                        | Filter                                        | <none>                                                                                                                                                                                                             |
|                        | Weight                                        | <none>                                                                                                                                                                                                             |
|                        | Split File                                    | <none>                                                                                                                                                                                                             |
|                        | N of Rows in Working Data File                | 446                                                                                                                                                                                                                |
| Missing Value Handling | Definition of Missing                         | User-defined missing values are treated as missing.                                                                                                                                                                |
|                        | Cases Used                                    | Statistics are based on cases with no missing values for any variable used.                                                                                                                                        |
|                        |                                               | REGRESSION<br>/MISSING LISTWISE<br>/STATISTICS COEFF<br>OUTS R ANOVA COLLIN<br>TOL<br>/CRITERIA=PIN(.05)<br>POUT(.10)<br>/NOORIGIN<br>/DEPENDENT EoM<br>/METHOD=ENTER<br>InDisCulDisLnGeoDisLnEco<br>DisLnVen FTA. |
| Syntax                 |                                               |                                                                                                                                                                                                                    |
|                        |                                               |                                                                                                                                                                                                                    |
|                        |                                               |                                                                                                                                                                                                                    |
| Resources              | Processor Time                                | 00:00:00.02                                                                                                                                                                                                        |
|                        | Elapsed Time                                  | 00:00:00.02                                                                                                                                                                                                        |
|                        | Memory Required                               | 4732 bytes                                                                                                                                                                                                         |
|                        | Additional Memory Required for Residual Plots | 0 bytes                                                                                                                                                                                                            |

[DataSet1]

**Table S17: Variables Entered Method**

**Variables Entered/Removed<sup>a</sup>**

| Model | Variables Entered                                          | Variables Removed | Method |
|-------|------------------------------------------------------------|-------------------|--------|
| 1     | FTA, LnVen, LnEcoDis, CulDis, InDis, LnGeoDis <sup>b</sup> | .                 | Enter  |

a. Dependent Variable: EoM

b. All requested variables entered.

**Table S18: Model Summary**

| Model Summary |                   |          |                   |                            |
|---------------|-------------------|----------|-------------------|----------------------------|
| Model         | R                 | R Square | Adjusted R Square | Std. Error of the Estimate |
| 1             | .353 <sup>a</sup> | .124     | .112              | .391                       |

a. Predictors: (Constant), FTA, LnVen, LnEcoDis, CulDis, InDis, LnGeoDis

**Table S19: Variables ANOVA**

| ANOVA <sup>a</sup> |            |                |     |             |        |                   |
|--------------------|------------|----------------|-----|-------------|--------|-------------------|
| Model              |            | Sum of Squares | df  | Mean Square | F      | Sig.              |
| 1                  | Regression | 9.397          | 6   | 1.566       | 10.226 | .000 <sup>b</sup> |
|                    | Residual   | 66.170         | 432 | .153        |        |                   |
|                    | Total      | 75.567         | 438 |             |        |                   |

a. Dependent Variable: EoM

b. Predictors: (Constant), FTA, LnVen, LnEcoDis, CulDis, InDis, LnGeoDis

**Table S20: Coefficients**

| Coefficients <sup>a</sup> |            |                             |            |                           |        |      |                         |
|---------------------------|------------|-----------------------------|------------|---------------------------|--------|------|-------------------------|
| Model                     |            | Unstandardized Coefficients |            | Standardized Coefficients | t      | Sig. | Collinearity Statistics |
|                           |            | B                           | Std. Error | Beta                      |        |      | Tolerance               |
| 1                         | (Constant) | .387                        | .306       |                           | 1.265  | .207 |                         |
|                           | InDis      | .007                        | .010       | .045                      | .696   | .487 | .493                    |
|                           | CulDis     | -.034                       | .022       | -.091                     | -1.519 | .129 | .563                    |
|                           | LnGeoDis   | -.112                       | .035       | -.218                     | -3.245 | .001 | .447                    |
|                           | LnEcoDis   | .116                        | .024       | .278                      | 4.937  | .000 | .637                    |

|       |      |      |      |       |      |      |
|-------|------|------|------|-------|------|------|
| LnVen | .023 | .013 | .082 | 1.800 | .073 | .981 |
| FTA   | .069 | .040 | .082 | 1.740 | .083 | .921 |

**Table S21: VIF Result**

| Coefficients <sup>a</sup> |            |  | Collinearity Statistics |       |
|---------------------------|------------|--|-------------------------|-------|
| Model                     |            |  | VIF                     |       |
| 1                         | (Constant) |  |                         |       |
|                           | InDis      |  |                         | 2.030 |
|                           | CulDis     |  |                         | 1.778 |
|                           | LnGeoDis   |  |                         | 2.235 |
|                           | LnEcoDis   |  |                         | 1.569 |
|                           | LnVen      |  |                         | 1.020 |
|                           | FTA        |  |                         | 1.085 |

a. Dependent Variable: EoM

**Table S22: Collinearity Diagnostics**

| Collinearity Diagnostics <sup>a</sup> |           |            |                 |                      |       |        |          |
|---------------------------------------|-----------|------------|-----------------|----------------------|-------|--------|----------|
| Model                                 | Dimension | Eigenvalue | Condition Index | Variance Proportions |       |        |          |
|                                       |           |            |                 | (Constant)           | InDis | CulDis | LnGeoDis |
| 1                                     | 1         | 5.932      | 1.000           | .00                  | .00   | .00    | .00      |
|                                       | 2         | .640       | 3.046           | .00                  | .02   | .02    | .00      |
|                                       | 3         | .245       | 4.916           | .00                  | .00   | .55    | .00      |
|                                       | 4         | .149       | 6.316           | .00                  | .61   | .06    | .00      |
|                                       | 5         | .027       | 14.861          | .01                  | .02   | .02    | .02      |
|                                       | 6         | .005       | 33.821          | .03                  | .06   | .18    | .33      |
|                                       | 7         | .002       | 50.296          | .96                  | .29   | .16    | .65      |

**Table S23: Collinearity Diagnostics(Cont)**

| Collinearity Diagnostics <sup>a</sup> |           |                      |       |     |
|---------------------------------------|-----------|----------------------|-------|-----|
| Model                                 | Dimension | Variance Proportions |       |     |
|                                       |           | LnEcoDis             | LnVen | FTA |
| 1                                     | 1         | .00                  | .00   | .01 |
|                                       | 2         | .00                  | .00   | .71 |
|                                       | 3         | .00                  | .01   | .13 |
|                                       | 4         | .00                  | .01   | .13 |
|                                       | 5         | .04                  | .87   | .01 |

|   |     |     |     |
|---|-----|-----|-----|
| 6 | .79 | .01 | .00 |
| 7 | .17 | .08 | .01 |

a. Dependent Variable: EoM

#### LOGISTIC REGRESSION VARIABLES EoM

/METHOD=ENTER InDisCulDisLnGeoDisLnEcoDisLnVen FTA

/PRINT=GOODFIT ITER(1)

/CRITERIA=PIN(0.05) POUT(0.10) ITERATE(20) CUT(0.5).

#### Logistic Regression

**Table S24: Model 2 Logistic Regression**

| Notes                  |                                |                                                                                                                                                                                              |
|------------------------|--------------------------------|----------------------------------------------------------------------------------------------------------------------------------------------------------------------------------------------|
| Output Created         |                                | 15-JAN-2022 14:41:49                                                                                                                                                                         |
| Comments               |                                |                                                                                                                                                                                              |
| Input                  | Active Dataset                 | DataSet1                                                                                                                                                                                     |
|                        | Filter                         | <none>                                                                                                                                                                                       |
|                        | Weight                         | <none>                                                                                                                                                                                       |
|                        | Split File                     | <none>                                                                                                                                                                                       |
|                        | N of Rows in Working Data File | 446                                                                                                                                                                                          |
| Missing Value Handling | Definition of Missing          | User-defined missing values are treated as missing                                                                                                                                           |
| Syntax                 |                                | LOGISTIC REGRESSION<br>VARIABLES EoM<br>/METHOD=ENTER<br>InDisCulDisLnGeoDisLnEco<br>DisLnVen FTA<br>/PRINT=GOODFIT<br>ITER(1)<br>/CRITERIA=PIN(0.05)<br>POUT(0.10) ITERATE(20)<br>CUT(0.5). |
| Resources              | Processor Time                 | 00:00:00.02                                                                                                                                                                                  |
|                        | Elapsed Time                   | 00:00:00.02                                                                                                                                                                                  |

[DataSet1]

**Table S25: Model 2 Case Processing Summary**

| Case Processing Summary       |                      | N   | Percent |
|-------------------------------|----------------------|-----|---------|
| Unweighted Cases <sup>a</sup> |                      |     |         |
| Selected Cases                | Included in Analysis | 439 | 98.4    |
|                               | Missing Cases        | 7   | 1.6     |
|                               | Total                | 446 | 100.0   |
| Unselected Cases              |                      | 0   | .0      |
| Total                         |                      | 446 | 100.0   |

a. If weight is in effect, see classification table for the total number of cases.

**Table S26: Model 2 Case Processing Summary**

| Case Processing Summary |                |
|-------------------------|----------------|
| Original Value          | Internal Value |
| 0                       | 0              |
| 1                       | 1              |

**Block 0: Beginning Block****Table S27: Model 2 Iteration History – Beginning Block**

| Iteration History <sup>a,b,c</sup> |                      |              |       |
|------------------------------------|----------------------|--------------|-------|
| Iteration                          | -2 Log<br>likelihood | Coefficients |       |
|                                    |                      | Constant     |       |
| Step 0                             | 1                    | 465.293      | 1.116 |
|                                    | 2                    | 463.688      | 1.255 |
|                                    | 3                    | 463.686      | 1.260 |
|                                    | 4                    | 463.686      | 1.260 |

a. Constant is included in the model.

b. Initial -2 Log Likelihood: 463.686

c. Estimation terminated at iteration number 4 because parameter estimates changed by less than .001.

**Table S28: Model 2 Classification Table – Beginning Block**

Classification Table<sup>a,b</sup>

| Observed |                    | Predicted |     |                       |
|----------|--------------------|-----------|-----|-----------------------|
|          |                    | EoM       |     | Percentage<br>Correct |
|          |                    | 0         | 1   |                       |
| Step 0   | EoM 0              | 0         | 97  | .0                    |
|          | 1                  | 0         | 342 | 100.0                 |
|          | Overall Percentage |           |     | 77.9                  |

a. Constant is included in the model.

b. The cut value is .500

**Table S29: Model 2 Variables in the Equation – Beginning Block**

| Variables in the Equation |          |       |      |         |    |      |        |
|---------------------------|----------|-------|------|---------|----|------|--------|
|                           |          | B     | S.E. | Wald    | df | Sig. | Exp(B) |
| Step 0                    | Constant | 1.260 | .115 | 119.989 | 1  | .000 | 3.526  |

**Table S30: Model 2 Variables not in the Equation – Beginning Block**

| Variables not in the Equation |                    |        |    |      |
|-------------------------------|--------------------|--------|----|------|
|                               |                    | Score  | df | Sig. |
| Step 0                        | InDis              | .754   | 1  | .385 |
|                               | CulDis             | 15.813 | 1  | .000 |
|                               | LnGeoDis           | 10.561 | 1  | .001 |
|                               | LnEcoDis           | 18.438 | 1  | .000 |
|                               | LnVen              | 3.764  | 1  | .052 |
|                               | FTA                | 2.950  | 1  | .086 |
|                               | Overall Statistics | 54.594 | 6  | .000 |

**Block 1: Method = Enter**

**Table S31: Model 2 Iteration History– Enter**

| Iteration History <sup>a,b,c,d</sup> |                      |              |        |        |          |          |       |      |
|--------------------------------------|----------------------|--------------|--------|--------|----------|----------|-------|------|
| Iteration                            | -2 Log<br>likelihood | Coefficients |        |        |          |          |       |      |
|                                      |                      | Constant     | InDis  | CulDis | LnGeoDis | LnEcoDis | LnVen |      |
| Step 1                               | 1                    | 417.574      | -.450  | .028   | -.136    | -.449    | .466  | .092 |
|                                      | 2                    | 403.083      | -1.481 | .092   | -.325    | -.594    | .673  | .151 |
|                                      | 3                    | 401.811      | -1.980 | .130   | -.436    | -.620    | .737  | .171 |
|                                      | 4                    | 401.797      | -2.038 | .135   | -.450    | -.623    | .745  | .173 |
|                                      | 5                    | 401.797      | -2.038 | .135   | -.450    | -.623    | .745  | .173 |

**Iteration History<sup>a,b,c,d</sup>**

| Iteration |   | Coefficients |
|-----------|---|--------------|
|           |   | FTA          |
| Step 1    | 1 | .276         |
|           | 2 | .485         |
|           | 3 | .587         |
|           | 4 | .599         |
|           | 5 | .599         |

a. Method: Enter

b. Constant is included in the model.

c. Initial -2 Log Likelihood: 463.686

d. Estimation terminated at iteration number 5 because parameter estimates changed by less than .001.

**Table S32: Model 2 Iteration History– Enter****Omnibus Tests of Model Coefficients**

|        |       | Chi-square | df | Sig. |
|--------|-------|------------|----|------|
| Step 1 | Step  | 61.889     | 6  | .000 |
|        | Block | 61.889     | 6  | .000 |
|        | Model | 61.889     | 6  | .000 |

**Table S33: Model 2 Model Summary – Enter****Model Summary**

| Step | -2 Log likelihood    | Cox & Snell R Square | Nagelkerke R Square |
|------|----------------------|----------------------|---------------------|
| 1    | 401.797 <sup>a</sup> | .131                 | .202                |

a. Estimation terminated at iteration number 5 because parameter estimates changed by less than .001.

**Table S34: Model 2 Hosmer and Lemeshow Test – Enter****Hosmer and Lemeshow Test**

| Step | Chi-square | df | Sig. |
|------|------------|----|------|
| 1    | 10.075     | 8  | .260 |

**Table S35: Model 2 Contingency Table for Hosmer and Lemeshow Test – Enter**

**Contingency Table for Hosmer and Lemeshow Test**

|    | EoM = 0  |          | EoM = 1  |          | Total |
|----|----------|----------|----------|----------|-------|
|    | Observed | Expected | Observed | Expected |       |
| 1  | 27       | 24.512   | 17       | 19.488   | 44    |
| 2  | 20       | 17.711   | 24       | 26.289   | 44    |
| 3  | 9        | 12.763   | 33       | 29.237   | 42    |
| 4  | 11       | 9.797    | 31       | 32.203   | 42    |
| 5  | 3        | 8.181    | 41       | 35.819   | 44    |
| 6  | 7        | 7.063    | 36       | 35.937   | 43    |
| 7  | 7        | 6.512    | 38       | 38.488   | 45    |
| 8  | 5        | 5.600    | 39       | 38.400   | 44    |
| 9  | 7        | 3.758    | 36       | 39.242   | 43    |
| 10 | 1        | 1.105    | 47       | 46.895   | 48    |

**Table S36: Model 2 Classification Table– Enter**

**Classification Table<sup>a</sup>**

| Observed |                    | Predicted |     |                    |
|----------|--------------------|-----------|-----|--------------------|
|          |                    | EoM       |     | Percentage Correct |
|          |                    | 0         | 1   |                    |
| Step 1   | EoM 0              | 18        | 79  | 18.6               |
|          | EoM 1              | 11        | 331 | 96.8               |
|          | Overall Percentage |           |     | 79.5               |

a. The cut value is .500

**Table S37: Model 2 Variables in the Equation – Enter**

**Variables in the Equation**

|          | B      | S.E.  | Wald   | df | Sig. | Exp(B) |
|----------|--------|-------|--------|----|------|--------|
| InDis    | .135   | .072  | 3.521  | 1  | .061 | 1.145  |
| CulDis   | -.450  | .175  | 6.575  | 1  | .010 | .638   |
| LnGeoDis | -.623  | .222  | 7.876  | 1  | .005 | .536   |
| LnEcoDis | .745   | .158  | 22.325 | 1  | .000 | 2.106  |
| LnVen    | .173   | .083  | 4.353  | 1  | .037 | 1.189  |
| FTA      | .599   | .279  | 4.613  | 1  | .032 | 1.821  |
| Constant | -2.038 | 2.057 | .982   | 1  | .322 | .130   |



a. Variable(s) entered on step 1: InDis, CulDis, LnGeoDis, LnEcoDis, LnVen, FTA.

#### LOGISTIC REGRESSION VARIABLES EoM

/METHOD=ENTER InDisCulDisLnGeoDisLnEcoDis

/PRINT=GOODFIT ITER(1)

/CRITERIA=PIN(0.05) POUT(0.10) ITERATE(20) CUT(0.5).

#### Logistic Regression

**Table S38: Model 1 - Logistic Regression**

| Notes                  |                                |                                                    |
|------------------------|--------------------------------|----------------------------------------------------|
| Output Created         |                                | 15-JAN-2022 14:42:06                               |
| Comments               |                                |                                                    |
| Input                  | Active Dataset                 | DataSet1                                           |
|                        | Filter                         | <none>                                             |
|                        | Weight                         | <none>                                             |
|                        | Split File                     | <none>                                             |
|                        | N of Rows in Working Data File | 446                                                |
| Missing Value Handling | Definition of Missing          | User-defined missing values are treated as missing |
| Syntax                 |                                | LOGISTIC REGRESSION                                |
|                        |                                | VARIABLES EoM                                      |
|                        |                                | /METHOD=ENTER                                      |
|                        |                                | InDisCulDisLnGeoDisLnEcoDis                        |
|                        |                                | Dis                                                |
| Resources              |                                | /PRINT=GOODFIT                                     |
|                        |                                | ITER(1)                                            |
|                        |                                | /CRITERIA=PIN(0.05)                                |
|                        |                                | POUT(0.10) ITERATE(20)                             |
|                        |                                | CUT(0.5).                                          |
|                        | Processor Time                 | 00:00:00.03                                        |
|                        | Elapsed Time                   | 00:00:00.02                                        |

[DataSet1]

**Table S39: Model 1 Case Processing Summary**

| Case Processing Summary       |                      |     |         |
|-------------------------------|----------------------|-----|---------|
| Unweighted Cases <sup>a</sup> |                      | N   | Percent |
| Selected Cases                | Included in Analysis | 439 | 98.4    |
|                               | Missing Cases        | 7   | 1.6     |
|                               | Total                | 446 | 100.0   |
| Unselected Cases              |                      | 0   | .0      |

|       |     |       |
|-------|-----|-------|
| Total | 446 | 100.0 |
|-------|-----|-------|

a. If weight is in effect, see classification table for the total number of cases.

**Table S40: Model 1Dependent Variable Encoding**

**Dependent Variable Encoding**

| Original Value | Internal Value |
|----------------|----------------|
| 0              | 0              |
| 1              | 1              |

**Block 0: Beginning Block**

**Table S41: Model 1Iteration History - Beginning Block**

**Iteration History<sup>a,b,c</sup>**

| Iteration | -2 Log<br>likelihood | Coefficients |
|-----------|----------------------|--------------|
|           |                      | Constant     |
| 1         | 465.293              | 1.116        |
| 2         | 463.688              | 1.255        |
| 3         | 463.686              | 1.260        |
| 4         | 463.686              | 1.260        |

- a. Constant is included in the model.
- b. Initial -2 Log Likelihood: 463.686
- c. Estimation terminated at iteration number 4 because parameter estimates changed by less than .001.

**Table S42: Model 1Classification Table - Beginning Block**

**Classification Table<sup>a,b</sup>**

| Observed           | Predicted |     |                       |
|--------------------|-----------|-----|-----------------------|
|                    | EoM       |     | Percentage<br>Correct |
|                    | 0         | 1   |                       |
| 0                  | 0         | 97  | .0                    |
| 1                  | 0         | 342 | 100.0                 |
| Overall Percentage |           |     | 77.9                  |

- a. Constant is included in the model.

b. The cut value is .500

**Table S43: Model 1 Variables in the Equation - Beginning Block**

|        |          | Variables in the Equation |      |         |    |      |        |
|--------|----------|---------------------------|------|---------|----|------|--------|
|        |          | B                         | S.E. | Wald    | df | Sig. | Exp(B) |
| Step 0 | Constant | 1.260                     | .115 | 119.989 | 1  | .000 | 3.526  |

**Table S44: Model 1 Variables not in the Equation- Beginning Block**

|        |                    | Variables not in the Equation |    |      |
|--------|--------------------|-------------------------------|----|------|
|        |                    | Score                         | df | Sig. |
| Step 0 | InDis              | .754                          | 1  | .385 |
|        | CulDis             | 15.813                        | 1  | .000 |
|        | LnGeoDis           | 10.561                        | 1  | .001 |
|        | LnEcoDis           | 18.438                        | 1  | .000 |
|        | Overall Statistics | 48.923                        | 4  | .000 |

**Block 1: Method = Enter**

**Table S45: Model 1 Iteration History- Enter**

| Iteration History <sup>a,b,c,d</sup> |                      |              |       |        |          |          |      |
|--------------------------------------|----------------------|--------------|-------|--------|----------|----------|------|
| Iteration                            | -2 Log<br>likelihood | Coefficients |       |        |          |          |      |
|                                      |                      | Constant     | InDis | CulDis | LnGeoDis | LnEcoDis |      |
| Step 1                               | 1                    | 422.819      | .299  | .021   | -.157    | -.434    | .468 |
|                                      | 2                    | 411.210      | .207  | .075   | -.321    | -.605    | .654 |
|                                      | 3                    | 410.499      | .204  | .103   | -.396    | -.647    | .696 |
|                                      | 4                    | 410.494      | .208  | .105   | -.403    | -.651    | .700 |
|                                      | 5                    | 410.494      | .208  | .105   | -.403    | -.651    | .700 |

a. Method: Enter

b. Constant is included in the model.

c. Initial -2 Log Likelihood: 463.686

d. Estimation terminated at iteration number 5 because parameter estimates changed by less than .001.

**Table S46: Model 1Omnibus Tests of Model Coefficients- Enter**

| Omnibus Tests of Model Coefficients |       |            |    |      |
|-------------------------------------|-------|------------|----|------|
|                                     |       | Chi-square | df | Sig. |
| Step 1                              | Step  | 53.192     | 4  | .000 |
|                                     | Block | 53.192     | 4  | .000 |
|                                     | Model | 53.192     | 4  | .000 |

**Table S47: Model 1Model Summary- Enter**

| Model Summary |                      |                      |                     |
|---------------|----------------------|----------------------|---------------------|
| Step          | -2 Log likelihood    | Cox & Snell R Square | Nagelkerke R Square |
| 1             | 410.494 <sup>a</sup> | .114                 | .175                |

a. Estimation terminated at iteration number 5 because parameter estimates changed by less than .001.

**Table S48: Model 1Hosmer and Lemeshow Test - Enter**

| Hosmer and Lemeshow Test |            |    |      |
|--------------------------|------------|----|------|
| Step                     | Chi-square | df | Sig. |
| 1                        | 33.727     | 8  | .000 |

**Table S49: Model 1Contingency Table for Hosmer and Lemeshow Test - Enter**

| Contingency Table for Hosmer and Lemeshow Test |          |          |          |          |        |    |
|------------------------------------------------|----------|----------|----------|----------|--------|----|
|                                                | EoM = 0  |          | EoM = 1  |          | Total  |    |
|                                                | Observed | Expected | Observed | Expected |        |    |
| Step 1                                         | 1        | 22       | 21.153   | 21       | 21.847 | 43 |
|                                                | 2        | 14       | 18.370   | 30       | 25.630 | 44 |
|                                                | 3        | 20       | 10.745   | 12       | 21.255 | 32 |
|                                                | 4        | 5        | 10.729   | 34       | 28.271 | 39 |
|                                                | 5        | 10       | 9.734    | 33       | 33.266 | 43 |
|                                                | 6        | 11       | 7.252    | 35       | 38.748 | 46 |
|                                                | 7        | 0        | 3.247    | 25       | 21.753 | 25 |
|                                                | 8        | 9        | 8.948    | 64       | 64.052 | 73 |
|                                                | 9        | 1        | 5.031    | 43       | 38.969 | 44 |
|                                                | 10       | 5        | 1.791    | 45       | 48.209 | 50 |

**Table S50: Model 1Classification Table- Enter**

**Classification Table<sup>a</sup>**

| Observed |                    | Predicted |     |                    |
|----------|--------------------|-----------|-----|--------------------|
|          |                    | EoM       |     | Percentage Correct |
|          |                    | 0         | 1   |                    |
| Step 1   | EoM 0              | 7         | 90  | 7.2                |
|          | 1                  | 5         | 337 | 98.5               |
|          | Overall Percentage |           |     | 78.4               |

a. The cut value is .500

**Table S51: Model 1Variables in the Equation- Enter**

**Variables in the Equation**

|                              | B     | S.E.  | Wald   | df | Sig. | Exp(B) |
|------------------------------|-------|-------|--------|----|------|--------|
| InDis                        | .105  | .067  | 2.438  | 1  | .118 | 1.111  |
| CulDis                       | -.403 | .164  | 6.001  | 1  | .014 | .668   |
| Step 1 <sup>a</sup> LnGeoDis | -.651 | .222  | 8.587  | 1  | .003 | .522   |
| LnEcoDis                     | .700  | .151  | 21.393 | 1  | .000 | 2.013  |
| Constant                     | .208  | 1.853 | .013   | 1  | .910 | 1.232  |

a. Variable(s) entered on step 1: InDis, CulDis, LnGeoDis, LnEcoDis.
